# Supplementary material for: Choice of Reference Sequence and Assembler for Alignment of Listeria monocytogenes Short-Read Sequence Data Greatly Influences Rates of Error in SNP Analyses
Source: PubMed Central journal article supplement (PMC4140716; doi:10.1371/journal.pone.0104579), 2014-08-21
Supplement: pone.0104579.s004.pdf [file pone.0104579.s004.pdf]

## **Supporting Information for:**

### **Choice of reference sequence and assembler for alignment of *Listeria monocytogenes* short-read sequence data greatly influences rates of error in SNP analyses**

Arthur W. Pightling<sup>1</sup>, Nicholas Petronella<sup>2</sup> and Franco Pagotto<sup>1\*</sup>

\* Corresponding author [Franco.Pagotto@hc-sc.gc.ca](mailto:Franco.Pagotto@hc-sc.gc.ca)

<sup>1</sup> Listeriosis Reference Service for Canada, Research Division, Bureau of Microbial Hazards, Food Directorate, Health Products and Food Branch, Health Canada, Ottawa, Ontario, Canada

<sup>2</sup> Biostatistics and Modelling Division, Bureau of Food Surveillance and Science Integration, Food Directorate, Health Products and Food Branch, Health Canada, Ottawa, Ontario, Canada

**Table S1: Calls used for read-quality trimming and filtering, assembly, and local realignment of Illumina short-read sequences.**

| Function                               | Application                           | Calls                                                                                                                                                                                                                                                              |
|----------------------------------------|---------------------------------------|--------------------------------------------------------------------------------------------------------------------------------------------------------------------------------------------------------------------------------------------------------------------|
| Trim and filter reads with PoPoolation | trim-fastq.pl                         | trim-fastq.pl --fastq-type sanger --input1 file1.fastq --input2 file2.fastq --quality-threshold 20 --min-length 50                                                                                                                                                 |
| Prepare index for BWA alignment        | index                                 | bwa index reference.fasta                                                                                                                                                                                                                                          |
| Prepare reads for BWA alignment        | aln                                   | bwa aln reference.fasta file1.fastq > file1.sai; bwa aln reference.fasta file2.fastq > file2.sai                                                                                                                                                                   |
| BWA alignment                          | sampe                                 | bwa sampe reference.fasta file1.sai file2.sai file1.fastq file2.fastq > file.sam                                                                                                                                                                                   |
| Convert files to MOSAIK format         | MosaikBuild                           | MosaikBuild -fr reference.fasta -oa reference.dat;MosaikBuild -q file1.fastq -q2 file2.fastq -st illumina -mfl 500 -out file.mkb                                                                                                                                   |
| MOSAIK alignment                       | MosaikAligner                         | MosaikAligner -in file.mkb -out file.mka -ia reference.dat -annpe/MOSAIK/src/networkFile/2.1.78.pe.ann -annse /MOSAIK/src/networkFile/2.1.78.se.ann                                                                                                                |
| Prepare index for Novoalign alignment  | novoindex                             | novoindex reference.nci reference.fasta                                                                                                                                                                                                                            |
| Novoalign alignment                    | novoalign                             | novoalign --hdrhd off -f file1.fastq file2.fastq -d reference.nci -o SAM > file.sam                                                                                                                                                                                |
| Prepare index for SMALT alignment      | index                                 | smalt index -k 20 -s 13 reference reference.fasta                                                                                                                                                                                                                  |
| SMALT alignment                        | map                                   | smalt map -f samsoft -o file.sam -n 3 reference file1.fastq file2.fastq                                                                                                                                                                                            |
| Re-align reads around indels           | RealignerTargetCreator/IndelRealigner | gatk.sh RealignerTargetCreator -I file.bam -R reference.fasta -o file.intervals;gatk.sh IndelRealigner -I file.bam -R reference.fasta --max Consensuses 60 --maxReadsForConsensuses 240 --maxReadsForRealignment 6000 --targetIntervals file.intervals -o file.bam |
