# Supplementary material for: Choice of Reference Sequence and Assembler for Alignment of Listeria monocytogenes Short-Read Sequence Data Greatly Influences Rates of Error in SNP Analyses
Source: PubMed Central journal article supplement (PMC4140716; doi:10.1371/journal.pone.0104579), 2014-08-21
Supplement: pone.0104579.s006.pdf [file pone.0104579.s006.pdf]

## **Supporting Information for:**

### **Choice of reference sequence and assembler for alignment of *Listeria monocytogenes* short-read sequence data greatly influences rates of error in SNP analyses**

Arthur W. Pightling<sup>1</sup>, Nicholas Petronella<sup>2</sup> and Franco Pagotto<sup>1\*</sup>

\* Corresponding author [Franco.Pagotto@hc-sc.gc.ca](mailto:Franco.Pagotto@hc-sc.gc.ca)

<sup>1</sup> Listeriosis Reference Service for Canada, Research Division, Bureau of Microbial Hazards, Food Directorate, Health Products and Food Branch, Health Canada, Ottawa, Ontario, Canada

<sup>2</sup> Biostatistics and Modelling Division, Bureau of Food Surveillance and Science Integration, Food Directorate, Health Products and Food Branch, Health Canada, Ottawa, Ontario, Canada

**Table S3: Summary statistics describing three sequencing runs of four *Listeria monocytogenes* strain 08-5578 genomic DNA samples on an Illumina MiSeq benchtop sequencer.** Genomic DNA was extracted from an *L. monocytogenes* strain 08-5578 culture grown from a single colony. The sample was then divided into four subsamples that were indexed and sequenced three times.

| Run | Yield  | Average Cluster Density (k/mm <sup>2</sup> ) | Total Reads | Reads Passing Filter |
|-----|--------|----------------------------------------------|-------------|----------------------|
| 1   | 3.96GB | 478.5                                        | 9,357,411   | 8,506,127            |
| 2   | 1.16GB | 178.5                                        | 5,077,244   | 2,302,912            |
| 3   | 7.76GB | 1075.0                                       | 19,068,628  | 16,320,666           |
