# Supplementary material for: Choice of Reference Sequence and Assembler for Alignment of Listeria monocytogenes Short-Read Sequence Data Greatly Influences Rates of Error in SNP Analyses
Source: PubMed Central journal article supplement (PMC4140716; doi:10.1371/journal.pone.0104579), 2014-08-21
Supplement: pone.0104579.s007.pdf [file pone.0104579.s007.pdf]

## Supporting Information for:

### **Choice of reference sequence and assembler for alignment of *Listeria monocytogenes* short-read sequence data greatly influences rates of error in SNP analyses**

Arthur W. Pightling<sup>1</sup>, Nicholas Petronella<sup>2</sup> and Franco Pagotto<sup>1\*</sup>

\* Corresponding author [Franco.Pagotto@hc-sc.gc.ca](mailto:Franco.Pagotto@hc-sc.gc.ca)

<sup>1</sup> Listeriosis Reference Service for Canada, Research Division, Bureau of Microbial Hazards, Food Directorate, Health Products and Food Branch, Health Canada, Ottawa, Ontario, Canada

<sup>2</sup> Biostatistics and Modelling Division, Bureau of Food Surveillance and Science Integration, Food Directorate, Health Products and Food Branch, Health Canada, Ottawa, Ontario, Canada

**Table S4: Numbers of false positive sites, true positive sites, ambiguous sites, and gaps detected in consensus sequences calculated from alignments of Illumina short-read data to a nearly identical reference with four reference-guided assemblers.** The ability of four reference-guided short-read sequence assemblers (BWA, MOSAIK, Novoalign, and SMALT) to align *Listeria monocytogenes* strain 08-5578 genome sequence data was assessed by aligning twelve sets of reads to a reference chromosome sequence that differs by three nucleotides. The ranges of events observed are shown with averages in parentheses. The values for all twelve datasets are provided as well as those with 50-fold or greater coverage. The best values for each category are bolded.

|           | False Positive Sites |                 | True Positive Sites |                 | Ambiguous Sites       |                      | Gaps                 |                   |
|-----------|----------------------|-----------------|---------------------|-----------------|-----------------------|----------------------|----------------------|-------------------|
|           | Total                | ≥ 50X           | Total               | ≥ 50X           | Total                 | ≥ 50X                | Total                | ≥ 50X             |
| BWA       | 0-22 (3.75)          | 1 (1.00)        | <b>1-3 (2.33)</b>   | <b>3 (3.00)</b> | 13-363 (147.00)       | 13-14 (13.5)         | <b>4-322 (81.08)</b> | 4 (4.00)          |
| MOSAIK    | 0-19 (3.50)          | <b>0 (0.00)</b> | <b>1-3 (2.33)</b>   | <b>3 (3.00)</b> | <b>12-277 (90.75)</b> | <b>12-14 (13.00)</b> | 8-341 (86.75)        | 4 (4.00)          |
| Novoalign | <b>0-15 (3.33)</b>   | <b>0 (0.00)</b> | 1-3 (1.92)          | 2 (2.00)        | 10-312 (119.00)       | 11-21 (14.67)        | 13-469 (122.25)      | 13-19 (16.67)     |
| SMALT     | 0-20 (3.42)          | <b>0 (0.00)</b> | <b>1-3 (2.33)</b>   | <b>3 (3.00)</b> | 17-431 (192.25)       | 17-23 (19.33)        | 2-424 (111.42)       | <b>2-6 (3.67)</b> |
