# Supplementary material for: Choice of Reference Sequence and Assembler for Alignment of Listeria monocytogenes Short-Read Sequence Data Greatly Influences Rates of Error in SNP Analyses
Source: PubMed Central journal article supplement (PMC4140716; doi:10.1371/journal.pone.0104579), 2014-08-21
Supplement: pone.0104579.s008.pdf [file pone.0104579.s008.pdf]

## **Supporting Information for:**

### **Choice of reference sequence and assembler for alignment of *Listeria monocytogenes* short-read sequence data greatly influences rates of error in SNP analyses**

Arthur W. Pightling<sup>1</sup>, Nicholas Petronella<sup>2</sup> and Franco Pagotto<sup>1\*</sup>

\* Corresponding author [Franco.Pagotto@hc-sc.gc.ca](mailto:Franco.Pagotto@hc-sc.gc.ca)

<sup>1</sup> Listeriosis Reference Service for Canada, Research Division, Bureau of Microbial Hazards, Food Directorate, Health Products and Food Branch, Health Canada, Ottawa, Ontario, Canada

<sup>2</sup> Biostatistics and Modelling Division, Bureau of Food Surveillance and Science Integration, Food Directorate, Health Products and Food Branch, Health Canada, Ottawa, Ontario, Canada

**Table S5: Numbers of false positive sites, true positive sites, ambiguous sites, and gaps detected in consensus sequences calculated from alignments of Illumina short-read data to a non-identical reference with four reference-guided assemblers.** The ability of four reference-guided short-read sequence assemblers (BWA, MOSAIK, Novoalign, and SMALT) to align *Listeria monocytogenes* strain 08-5578 genome sequence data was assessed by aligning twelve sets of reads to a reference chromosome sequence (strain EGD-e) that differs by 25,347 nucleotides. The ranges of events observed are shown with averages in parentheses. The values for all twelve datasets are provided as well as those with 50-fold or greater coverage. The best values for each category are bolded.

|           | False Positive Sites              |                               | True Positive Sites                     |                                         | Ambiguous Sites                   |                               | Gaps                               |                                   |
|-----------|-----------------------------------|-------------------------------|-----------------------------------------|-----------------------------------------|-----------------------------------|-------------------------------|------------------------------------|-----------------------------------|
|           | Total                             | ≥ 50X                         | Total                                   | ≥ 50X                                   | Total                             | ≥ 50X                         | Total                              | ≥ 50X                             |
| BWA       | 791-2701<br>(1477.17)             | 791-952<br>(871.50)           | 16884-21792<br>(20262.08)               | 21753-21792<br>(21772.50)               | 251-932<br>(533.50)               | 251-284<br>(267.50)           | 1938-5305<br>(3004.10)             | 1938-1978<br>(1958.00)            |
| MOSAIK    | 657-1053<br>(787.92)              | 657-733<br>(695.00)           | 21427-22696<br>(22185.67)               | 22614-22696<br>(22655.00)               | <b>141-527</b><br><b>(268.00)</b> | 165-188<br>(176.50)           | 1120-2629<br>(1787.80)             | 1120-1249<br>(1184.50)            |
| Novoalign | <b>194-249</b><br><b>(218.83)</b> | <b>220</b><br><b>(220.00)</b> | 14734-19722<br>(16518.00)               | 19722<br>(19722.00)                     | 88-810<br>(439.00)                | <b>129</b><br><b>(129.00)</b> | 5058-10718<br>(8549.20)            | 5058<br>(5058.00)                 |
| SMALT     | 300-414<br>(356.67)               | 302-330<br>(314.33)           | <b>23511-24012</b><br><b>(23820.92)</b> | <b>23934-24012</b><br><b>(23978.33)</b> | 801-1608<br>(1186.75)             | 801-832<br>(817.33)           | <b>218-1175</b><br><b>(534.25)</b> | <b>218-287</b><br><b>(245.33)</b> |
