# Supplementary material for: Choice of Reference Sequence and Assembler for Alignment of Listeria monocytogenes Short-Read Sequence Data Greatly Influences Rates of Error in SNP Analyses
Source: PubMed Central journal article supplement (PMC4140716; doi:10.1371/journal.pone.0104579), 2014-08-21
Supplement: pone.0104579.s009.pdf [file pone.0104579.s009.pdf]

## **Supporting Information for:**

### **Choice of reference sequence and assembler for alignment of *Listeria monocytogenes* short-read sequence data greatly influences rates of error in SNP analyses**

Arthur W. Pightling<sup>1</sup>, Nicholas Petronella<sup>2</sup> and Franco Pagotto<sup>1\*</sup>

\* Corresponding author [Franco.Pagotto@hc-sc.gc.ca](mailto:Franco.Pagotto@hc-sc.gc.ca)

<sup>1</sup> Listeriosis Reference Service for Canada, Research Division, Bureau of Microbial Hazards, Food Directorate, Health Products and Food Branch, Health Canada, Ottawa, Ontario, Canada

<sup>2</sup> Biostatistics and Modelling Division, Bureau of Food Surveillance and Science Integration, Food Directorate, Health Products and Food Branch, Health Canada, Ottawa, Ontario, Canada

**Table S6: Total numbers of false positive sites, true positive sites, ambiguous sites, and gaps detected in consensus sequences calculated from alignments of Illumina MiSeq reads to a nearly identical reference with four reference-guided sequence assemblers before and after read-quality filtering and trimming.** Total numbers of sites and gaps present in consensus sequences calculated from alignments of twelve sets of *Listeria monocytogenes* strain 08-5578 short-read sequence data with four reference-guided assemblers (BWA, MOSAIK, Novoalign, and SMALT) were counted. An *L. monocytogenes* strain 08-5578 chromosome sequence obtained from the National Center for Biotechnology Information archive that is different at three nucleotide positions was used as a reference. The best values (Trim or No trim) for each aligner within each category are bolded.

|           | False Positive Sites |           | True Positive Sites |           | Ambiguous Sites |         | Gaps        |         |
|-----------|----------------------|-----------|---------------------|-----------|-----------------|---------|-------------|---------|
|           | Trim                 | No trim   | Trim                | No trim   | Trim            | No trim | Trim        | No trim |
| BWA       | <b>44</b>            | 52        | 25                  | <b>27</b> | <b>1589</b>     | 1779    | <b>951</b>  | 1080    |
| MOSAIK    | <b>42</b>            | 49        | 25                  | <b>27</b> | <b>987</b>      | 1051    | <b>1014</b> | 1123    |
| Novoalign | 40                   | <b>39</b> | <b>21</b>           | <b>21</b> | <b>1295</b>     | 1373    | <b>1413</b> | 1456    |
| SMALT     | <b>41</b>            | 43        | 25                  | <b>26</b> | <b>2067</b>     | 2231    | <b>1305</b> | 1372    |
