# Supplementary material for: Choice of Reference Sequence and Assembler for Alignment of Listeria monocytogenes Short-Read Sequence Data Greatly Influences Rates of Error in SNP Analyses
Source: PubMed Central journal article supplement (PMC4140716; doi:10.1371/journal.pone.0104579), 2014-08-21
Supplement: pone.0104579.s010.pdf [file pone.0104579.s010.pdf]

## **Supporting Information for:**

### **Choice of reference sequence and assembler for alignment of *Listeria monocytogenes* short-read sequence data greatly influences rates of error in SNP analyses**

Arthur W. Pightling<sup>1</sup>, Nicholas Petronella<sup>2</sup> and Franco Pagotto<sup>1\*</sup>

\* Corresponding author [Franco.Pagotto@hc-sc.gc.ca](mailto:Franco.Pagotto@hc-sc.gc.ca)

<sup>1</sup> Listeriosis Reference Service for Canada, Research Division, Bureau of Microbial Hazards, Food Directorate, Health Products and Food Branch, Health Canada, Ottawa, Ontario, Canada

<sup>2</sup> Biostatistics and Modelling Division, Bureau of Food Surveillance and Science Integration, Food Directorate, Health Products and Food Branch, Health Canada, Ottawa, Ontario, Canada

**Table S7: Total numbers of false positive sites, true positive sites, ambiguous sites, and gaps detected in consensus sequences calculated from alignments of Illumina MiSeq reads to a non-identical reference with four reference-guided sequence assemblers before and after read-quality filtering and trimming.** Total numbers of sites and gaps present in consensus sequences calculated from alignments of twelve sets of *Listeria monocytogenes* strain 08-5578 short-read sequence data with four reference-guided assemblers (BWA, MOSAIK, Novoalign, and SMALT) were counted. An *L. monocytogenes* strain EGD-e chromosome sequence obtained from the National Center for Biotechnology Information archive that is different at 25,347 nucleotide positions was used as a reference. The best values (Trim or No trim) for each aligner within each category are bolded.

|           | False Positive Sites |             | True Positive Sites |               | Ambiguous Sites |             | Gaps         |               |
|-----------|----------------------|-------------|---------------------|---------------|-----------------|-------------|--------------|---------------|
|           | Trim                 | No trim     | Trim                | No trim       | Trim            | No trim     | Trim         | No trim       |
| BWA       | <b>17726</b>         | 18379       | <b>243145</b>       | 241542        | <b>6402</b>     | 6591        | <b>36049</b> | 37120         |
| MOSAIK    | <b>9455</b>          | 9497        | <b>266228</b>       | 265767        | <b>3216</b>     | 3316        | <b>21453</b> | 22427         |
| Novoalign | 2626                 | <b>2610</b> | 198216              | <b>199378</b> | 5268            | <b>4956</b> | 102590       | <b>101571</b> |
| SMALT     | <b>4280</b>          | 4476        | <b>285851</b>       | 285815        | <b>14241</b>    | 15012       | <b>6411</b>  | 6573          |
